# Supplementary material
Source: Elsevier journal article supplement (https://www.sciencedirect.com/science/article/pii/S0365669120304433)
Supplement: mmc1 [file S0365669120304433:mmc1.doc]

**Material suplementario 1:** Cuestionarios Visual function questionnaire (VFQ-25) y Escala Hospitalaria de depresión y ansiedad (HADS) empleados.

**CUESTIONARIO DE CALIDAD DE VIDA PARA LA EVALUACIÓN DE PACIENTES CON DEGENERACIÓN MACULAR ASOCIADA A LA EDAD**

Esta encuesta es totalmente anónima y su participación es voluntaria.

Conteste a las preguntas marcando la opción que crea más adecuada

**DATOS DEL PACIENTE:** Rellene o marque con un círculo la opción que considere:

Edad: Sexo: Hombre / Mujer

**Años** desde que fue **diagnosticado/a** de su enfermedad (degeneración macular):

1) Menos de 5 años

2) Entre 5 y 10 años

3) Más de 10 años

**Formación educativa:**

1) Sin estudios básicos

2) Estudios básicos (colegio)

3) Estudios superiores (titulación universitaria)

Agudeza visual (a rellenar por el médico) ojo derecho: ojo izquierdo:

**CUESTIONARIO DE CALIDAD DE VIDA PARA LA EVALUACIÓN DE PACIENTES CON DEGENERACIÓN MACULAR ASOCIADA A LA EDAD**

**PRIMER CUESTIONARIO 1: VFQ-25** (Rodee con un círculo un solo número)

**PARTE 1 – VISTA Y SALUD GENERAL**

Excelente ........................ 1

Muy buena ...................... 2

Buena .............................. 3

Regular ............................. 4

Mala .................................. 5

1.En general diría que su salud es:

2. Actualmente diría que la vista de sus dos ojos es:

Excelente ........................... 1

Muy buena ......................... 2

Buena ................................. 3

Regular ................................ 4

Mala .................................... 5

Completamente ciego………6

3. ¿Con qué frecuencia le preocupa su vista?

Nunca ............................... 1 Pocas veces ..................... 2 Algunas veces ................... 3 Casi siempre ..................... 4 Siempre ............................. 5

4. ¿Cuánto dolor o molestias ha tenido en los ojos y alrededor de ellos (por ejemplo: escozor o picor)?

Ninguno ..................................... 1 Leve ........................................... 2 Moderado .................................. 3 Fuerte ........................................ 4 Muy Fuerte ................................ 5

**PARTE 2 – DIFICULTADES EN LAS ACTIVIDADES**

5. ¿Qué grado de dificultad tiene para leer la letra impresa normal de los periódicos?

Ninguna dificultad ...................................... 1

Poca dificultad ............................................ 2 Dificultad moderada ................................... 3 Dificultad extrema....................................... 4

He dejado de hacerlo a causa de la vista …..5

He dejado de hacerlo por otras razones o no estaba interesado/a en hacer esto …………….6

6. ¿Qué grado de dificultad tiene para realizar trabajos o aficiones que exigen que vea bien de cerca, como cocinar, coser, arreglar cosas en casa o usar herramientas?

Ninguna dificultad ...................................... 1 Poca dificultad ............................................ 2 Dificultad moderada ................................... 3 Dificultad extrema....................................... 4

He dejado de hacerlo a causa de la vista ……5 He dejado de hacerlo por otras razones o no estaba interesado/a en hacer esto …………….6

7. A causa de su vista, ¿qué grado de dificultad tiene para encontrar algo en una estantería llena de cosas?

Ninguna dificultad ...................................... 1 Poca dificultad ............................................ 2 Dificultad moderada ................................... 3 Dificultad extrema....................................... 4 He dejado de hacerlo a causa de la vista ……5 He dejado de hacerlo por otras razones o no estaba interesado/a en hacer esto …………….6

8. ¿Qué grado de dificultad tiene para leer la señalización de la calle o los rótulos de las tiendas?

Ninguna dificultad ...................................... 1 Poca dificultad ............................................ 2 Dificultad moderada ................................... 3 Dificultad extrema....................................... 4 He dejado de hacerlo a causa de la vista ……5 He dejado de hacerlo por otras razones o no estaba interesado/a en hacer esto …………….6

9. A causa de su vista, ¿qué grado de dificultad tiene para bajar escalones, escaleras o bordillos con poca luz o de noche?

Ninguna dificultad ...................................... 1 Poca dificultad ............................................ 2 Dificultad moderada ................................... 3 Dificultad extrema....................................... 4

He dejado de hacerlo a causa de la vista ……5 He dejado de hacerlo por otras razones o no estaba interesado/a en hacer esto …………….6

10. A causa de su vista, ¿qué grado de dificultad tiene para ver objetos que están a los lados mientras camina?

Ninguna dificultad ...................................... 1 Poca dificultad ............................................ 2 Dificultad moderada ................................... 3 Dificultad extrema....................................... 4 He dejado de hacerlo a causa de la vista ……5 He dejado de hacerlo por otras razones o no estaba interesado/a en hacer esto…………….6

11. A causa de su vista, ¿qué grado de dificultad tiene para ver cómo reacciona la gente a lo que usted dice?

Ninguna dificultad ...................................... 1 Poca dificultad ............................................ 2 Dificultad moderada ................................... 3 Dificultad extrema....................................... 4

He dejado de hacerlo a causa de la vista ……5

He dejado de hacerlo por otras razones o no estaba interesado/a en hacer esto …………….6

12. A causa de su vista, ¿qué grado de dificultad tiene para escoger y combinar su propia ropa?

Ninguna dificultad ...................................... 1 Poca dificultad ............................................ 2 Dificultad moderada ................................... 3 Dificultad extrema....................................... 4

He dejado de hacerlo a causa de la vista ……5 He dejado de hacerlo por otras razones o no estaba interesado/a en hacer esto…………….6

13. A causa de su vista, ¿qué grado de dificultad tiene para salir, ir a casa de la gente, a fiestas o a restaurantes?

Ninguna dificultad ...................................... 1 Poca dificultad ............................................ 2 Dificultad moderada ................................... 3 Dificultad extrema....................................... 4 He dejado de hacerlo a causa de la vista ……5 He dejado de hacerlo por otras razones o no estaba interesado/a en hacer esto …………….6

14. A causa de su vista, ¿qué grado de dificultad tiene para ir a ver películas, obras de teatro o acontecimientos deportivos?

Ninguna dificultad ...................................... 1 Poca dificultad ............................................ 2 Dificultad moderada ................................... 3 Dificultad extrema....................................... 4 He dejado de hacerlo a causa de la vista ……5 He dejado de hacerlo por otras razones o no estaba interesado/a en hacer esto …………….6

15. Ahora quisiera hacerle unas preguntas sobre **conducción**. ¿Conduce actualmente, al menos de vez en cuando?

SI……………………….1 (Pase a la pregunta 15.c)

No…………….……….2

15 a. **SI LA RESPUESTA ES NO**, CONTESTE: ¿No ha conducido nunca o ha dejado de conducir?

No ha conducido nunca ..................1 (Pase a la Parte 3, pregunta 17) Ha dejado de conducir ................... 2

15 b. **SI HA DEJADO DE CONDUCIR**, CONTESTE: ¿Fue principalmente a causa de su vista, principalmente por alguna otra razón o a causa tanto de su vista como de otras razones?

Principalmente por la vista ........................ 1 Principalmente por otras razones .............. 2 Tanto por la vista como por otras razones… 3 (Pase a la Parte 3, pregunta 17)

15 c. **SI CONDUCE ACTUALMENTE**, CONTESTE: ¿Qué grado de dificultad tiene al conducir de día por lugares que le son familiares?

Ninguna dificultad .................................. 1 Poca dificultad ....................................... 2 Dificultad moderada .............................. 3 Dificultad extrema.................................. 4

16. ¿Qué grado de dificultad tiene para conducir de noche?

Ninguna dificultad ...................................... 1 Poca dificultad ............................................ 2 Dificultad moderada ................................... 3 Dificultad extrema....................................... 4 He dejado de hacerlo a causa de la vista ……5 He dejado de hacerlo por otras razones o no estaba interesado/a en hacer esto …………….6

16 a. ¿Qué grado de dificultad tiene para conducir en condiciones difíciles, tales como mal tiempo, durante las horas punta, en la autopista o con el tráfico de la ciudad?

Ninguna dificultad ...................................... 1 Poca dificultad ............................................ 2 Dificultad moderada ................................... 3 Dificultad extrema....................................... 4 He dejado de hacerlo a causa de la vista ……5 He dejado de hacerlo por otras razones o no estaba interesado/a en hacer esto …………….6

**PARTE 3 – MANERA DE REACCIONAR A LOS PROBLEMAS DE LA VISTA**

**Las siguientes preguntas tratan sobre cómo puede verse afectado lo que hace por sus problemas de vista.**

17. ¿Consigue menos cosas de las que le gustaría a causa de su vista?

Siempre…………………………………….1

Casi siempre……………………………….2

Algunas veces…………….……………….3

Pocas veces……………….……………….4

Nunca……………………….………………5

18. ¿Limitan sus problemas de vista el tiempo que puede dedicar a trabajar o a realizar otras actividades?

Siempre…………………………………….1

Casi siempre……………………………….2

Algunas veces…………….……………….3

Pocas veces……………….………………4

Nunca ……………………….……………..5

19. ¿Hasta que punto su dolor o molestias en los ojos o alrededor de ellos, por ejemplo, escozor o picor, le impiden hacer lo que le gustaría estar haciendo?

Siempre…………………………………….1

Casi siempre……………………………….2

Algunas veces…………….……………….3

Pocas veces……………….……………….4

Nunca.……………………….……………...5

20. Me quedo en casa la mayor parte del tiempo a causa de mi vista.

Totalmente cierto………….………….1

Cierto en su mayor parte………..……2

No estoy seguro.……….……………...3

Falso en su mayor parte.……………..4

Totalmente falso………….……………5

21. Me siento frustrado/a muchas veces a causa de mi vista.

Totalmente cierto………….………….1

Cierto en su mayor parte………..…2

No estoy seguro.……….………………3

Falso en su mayor parte.…………..4

Totalmente falso………….……………5

22. Tengo mucho menos control sobre lo que hago a causa de mi vista.

Totalmente cierto………….………….1

Cierto en su mayor parte………..…...2

No estoy seguro.……….……………..3

Falso en su mayor parte.…………….4

Totalmente falso………….……………5

23. A causa de mi vista, tengo que fiarme demasiado de lo que otras personas me dicen.

Totalmente cierto………….…………..1

Cierto en su mayor parte………..……2

No estoy seguro.……….……………...3

Falso en su mayor parte.……………..4

Totalmente falso………….……………5

24. Necesito mucha ayuda de los demás a causa de mi vista.

Totalmente cierto………….………….1

Cierto en su mayor parte………..……2

No estoy seguro.……….……………..3

Falso en su mayor parte.…………….4

Totalmente falso………….……………5

25. Me preocupa hacer cosas que puedan avergonzarme a mí o a los demás, a causa de mi vista.

Totalmente cierto………….…………..1

Cierto en su mayor parte………..……2

No estoy seguro.……….………………3

Falso en su mayor parte.………………4

Totalmente falso………….…………….5

**SEGUNDO CUESTIONARIO: ESCALA HOSPITALARIA DE ANSIEDAD Y ESTRÉS**

Este cuestionario ha sido diseñado para ayudarnos a saber cómo se siente usted. Lea cada frase y **marque la respuesta** que más se ajusta a cómo se sintió durante la semana pasada. No piense mucho las respuestas. Lo más seguro es que si responde deprisa sus respuestas se ajustarán mucho más a cómo realmente se sintió.

**54. Me siento tenso/a o nervioso/a.**

1) Todos los días

2) Muchas veces

3) A veces

4) Nunca

**55. Todavía disfruto con lo que antes me gustaba.**

1) Como siempre

2) No lo bastante

3) Sólo un poco

4) Nada

**56. Tengo una sensación de miedo, como si algo horrible me fuera a suceder.**

1) Definitivamente y es muy fuerte

2) Sí, pero no es muy fuerte

3) Un poco, pero no me preocupa

4) Nada

**57. Puedo reírme y ver el lado divertido de las cosas.**

1) Al igual que siempre lo hice

2) No tanto ahora

3) Casi nunca

4) Nunca

**58. Tengo mi mente llena de preocupaciones.**

1) La mayoría de las veces

2) Con bastante frecuencia

3) A veces, aunque no muy a menudo

4) Sólo en ocasiones

**59. Me siento alegre.**

1) Nunca

2) No muy a menudo

3) A veces

4) Casi siempre

**60. Puedo estar sentado confortablemente y sentirme relajado.**

1) Siempre

2) Por lo general

3) No muy a menudo

4) Nunca

**61. Me siento como si cada día estuviera más lento.**

1) Por lo general, en todo momento

2) Muy a menudo

3) A veces

4) Nunca

**62. Tengo una sensación extraña, como si tuviera mariposas en el estómago.**

1) El Nunca

2) En ciertas ocasiones

3) Con bastante frecuencia

4) Muy a menudo

**63. He perdido interés en mi aspecto personal.**

1) Totalmente

2) No me preocupo tanto como debiera

3) Podría tener un poco más de cuidado

4) Me preocupo al igual que siempre

**64. Me siento inquieto/a, como si no pudiera parar de moverme.**

1) Mucho

2) Bastante

3) No mucho

4) Nada

**65. Me siento optimista respecto al futuro.**

1) Igual que siempre

2) Menos de lo que acostumbraba

3) Mucho menos de lo que acostumbraba

4) Nada

**66. Me asaltan sentimientos repentinos de pánico.**

1) Muy frecuentemente

2) Bastante a menudo

3) No muy a menudo

4) Rara vez

**67. Me divierto con un buen libro, la radio, o un programa de televisión.**

1) A menudo

2) A veces

3) No muy a menudo

4) Rara vez

**La entrevista ha terminado. Muchas gracias por su tiempo**
