# Supplementary material
Source: Elsevier journal article supplement (https://www.sciencedirect.com/science/article/pii/S0365669120304433)
Supplement: mmc2 [file S0365669120304433:mmc2.doc]

**Material suplementario 2:** Tabla con la puntuación (media ± desviación estándar y rango) en el cuestionario Visual function questionnaire (VFQ-25) para los pacientes con degeneración macular asociada a la edad neovascular.

| **PARTE 1: Vista y salud general** | **Puntuación media** | **Puntuaciones** |
| --- | --- | --- |
| 1. Salud general | 3,3 ±0,8  (rango 1 a 5) | Excelente= 1; Muy buena= 2  Buena= 3; Regular= 4  Mala= 5 |
| 2. Visión general | 4,0 ±0,7  (rango 3 a 5) | Excelente= 1 ; Muy buena= 2; Buena= 3; Regular= 4  Mala= 5; Completamente ciego= 6 |
| 3. Preocupación por la vista | 4,1 ±0,9  (rango 2 a 5) | Nunca= 1; Pocas veces= 2  Algunas veces= 3; Casi siempre= 4; Siempre= 5 |
| 4. Dolor ocular | 2,4 ±0,9 | Ninguno= 1; Leve= 2  Moderado= 3; Fuerte= 4  Muy Fuerte= 5 |
| **PARTE 2: Dificultades en las actividades** | **Puntuación media, siendo:**  Ninguna dificultad= 1; Poca dificultad= 2  Dificultad moderada= 3; Dificultad extrema= 4;  He dejado de hacerlo a causa de la vista 5;  He dejado de hacerlo por otras razones o no estaba interesado/a en hacer esto 6 | |
| 5. Leer periódicos | 3,4 ±1,5 (1 a 6) | |
| 6. Actividades de cerca: coser, cocinar | 3,1 ±1,3 (1 a 6) | |
| 7. Encontrar algo en una estantería | 2,5 ±1,1 (1 a 5) | |
| 8. Leer señalización calles o rótulos | 2,6 ±1,2 (1 a 5) | |
| 9. Bajar escaleras | 3,0 ±0,9 (1 a 5) | |
| 10. Ver objetos a los lados mientras camina | 2,6 ±1,0 (1 a 5) | |
| 11. Ver cómo reacciona la gente | 2,1 ±1,1 (1 a 5) | |
| 12. Escoger y combinar su ropa | 1,9 ±1,1 (1 a 5) | |
| 13.Salir, ir a casa de gente o a restaurantes | 2,3 ±1,5 (1 a 6) | |
| 14. Ver películas, obras de teatro o deportes | 2,6 ±1,7 (1 a 6) | |
| 15. Dificultad para conducir | 15% conduce actualmente; 85% no | |
| 16. Dificultad para conducir de noche | 3,7 ±1,3 (2 a 5) | |
| **PARTE 3 – MANERA DE REACCIONAR A LOS PROBLEMAS DE LA VISTA** | **Puntuación media, siendo:**  Totalmente cierto=1; Cierto en su mayor parte=2  No estoy seguro=3; Falso en su mayor parte=4  Totalmente falso=5 | |
| 17. ¿Consigue menos cosas de las que le gustaría a causa de su vista? | 2,9 ±1,4 (1 a 5) | |
| 18. ¿Limitan sus problemas de vista el tiempo que puede dedicar a trabajar o a realizar otras actividades? | 3,1 ±1,4 (1 a 5) | |
| 19. ¿Hasta qué punto su dolor o molestias en los ojos o alrededor de ellos, por ejemplo, escozor o picor, le impiden hacer lo que le gustaría estar haciendo? | 3,9 ±1,2 (1 a 5) | |
| 20. Me quedo en casa la mayor parte del tiempo a causa de mi vista. | 4,1 ±1,3 (1 a 5) | |
| 21. Me siento frustrado/a muchas veces a causa de mi vista. | 3,3 ±1,6 (1 a 5) | |
| 22. Tengo mucho menos control sobre lo que hago a causa de mi vista. | 3,0 ±1,5 (1 a 5) | |
| 23. A causa de mi vista, tengo que fiarme demasiado de lo que otras personas me dicen. | 3,6 ±1,5 (1 a 5) | |
| 24. Necesito mucha ayuda de los demás a causa de mi vista. | 3,8 ±1,3 (1 a 5) | |
| 25. Me preocupa hacer cosas que puedan avergonzarme a mí o a los demás, a causa de mi vista. | 4,3 ±1,3 (1 a 5) | |
